# Supplementary material for: Evolution of multiple phosphodiesterase isoforms in stickleback involved in cAMP signal transduction pathway
Source: PubMed Central journal article supplement (PMC2653465; doi:10.1186/1752-0509-3-23), 2009-02-20
Supplement: 1752-0509-3-23-S1.pdf [file 1752-0509-3-23-S1.pdf]

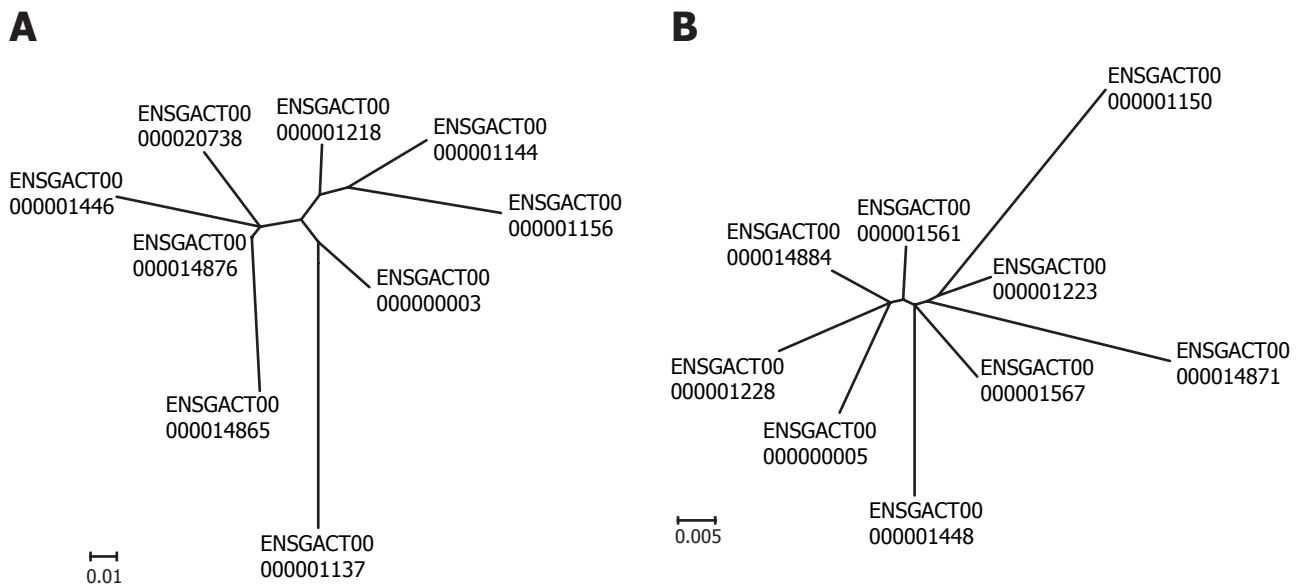

**Figure S1.** Maximum-likelihood trees of two families of unknown genes located around the PDE1Cb loci in stickleback. One of the families was analyzed using 207 base pairs (bp) of the alignable region of protein-coding sequence based on TrN +  $\Gamma$  model of nucleotide substitution (panel **A**), and the other family was analyzed using 567 bp of the alignable region of protein-coding sequence based on HKY +  $\Gamma$  model of nucleotide substitution (panel **B**).

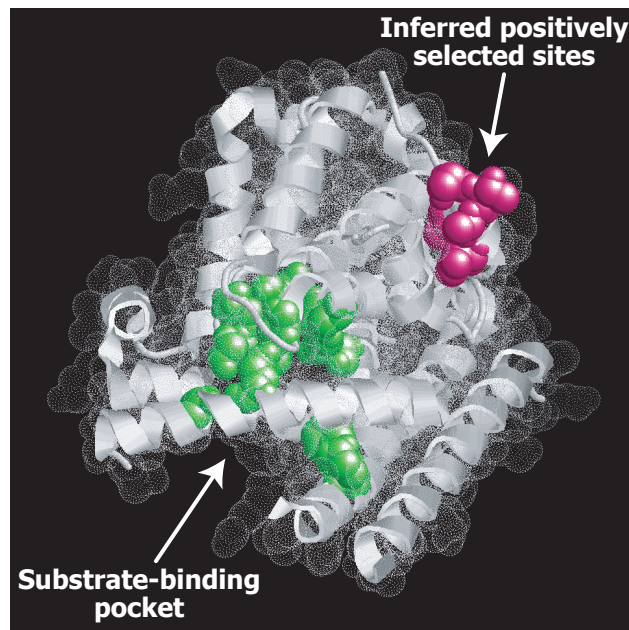

**Figure S2.** Distributions of locations of inferred positively-selected amino acid sites in the evolution of stickleback PDE1Cb (colored in magenta) and amino acid sites that are involved in a substrate-binding pocket of phosphodiesterase 1 enzymes (colored in green). The three-dimensional graphical model was constructed using the program RasMol. Human phosphodiesterase 1B (PDB ID: 1TAZ) was used as a reference structure based on a query to the homology modeling server SWISS-MODEL using amino acid sequences of stickleback PDE1Cb.

**Table S1 - List of genes located on the conserved syntenies around the vertebrate PDE locus (loci)**

| Species        | Chromosome/<br>Scaffold # | Name           | Ensembl ID                | Location                     |                       |
|----------------|---------------------------|----------------|---------------------------|------------------------------|-----------------------|
| Human          | Chr. 7                    | GHRHR          | ENSP00000320180           | 30,970,161-30,990,114        |                       |
|                |                           | ADCYAP1R1      | ENSP00000306620           | 31,058,650-31,117,614        |                       |
|                |                           | NEUROD6        | ENSP00000297142           | 31,343,607-31,347,063        |                       |
|                |                           | CCDC129        | ENSP00000313062           | 31,523,503-31,659,828        |                       |
|                |                           | C7orf16        | ENSP00000340125           | 31,693,372-31,714,593        |                       |
|                |                           | <b>PDE1C</b>   | <b>ENSP00000284920</b>    | <b>31,757,318-32,305,466</b> |                       |
|                |                           | LSM5           | ENSP00000223084           | 32,492,944-32,496,502        |                       |
|                |                           | KIAA0241       | ENSP00000315568           | 32,501,701-33,045,041        |                       |
|                |                           | KBTBD2         | ENSP00000302586           | 32,874,311-32,897,897        |                       |
|                |                           | AC018648.5     | ENSP00000335479           | 32,922,952-32,949,307        |                       |
|                | Chr. 1                    | ABCD3          | ENSP00000326880           | 94,656,599-94,756,670        |                       |
|                |                           | PTBP2          | ENSP00000236228           | 96,959,927-97,052,937        |                       |
|                |                           | PPAPR5         | ENSP00000263177           | 99,128,391-99,243,037        |                       |
|                |                           | RP4-788L13.1   | ENSP00000263178           | 99,502,436-99,547,734        |                       |
|                | Chr. 10                   | RSU1           | ENSP00000339521           | 16,672,625-16,899,468        |                       |
|                |                           | TRDMT1         | ENSP00000324263           | 17,224,988-17,283,687        |                       |
|                | Chicken                   | Chr. 2         | NP_001012876.1            | ENSGALP00000019958           | 48,770,436-48,992,328 |
|                |                           |                | NEUROD6                   | ENSGALP00000019951           | 48,697,032-48,698,045 |
|                |                           |                | C7orf16                   | ENSGALP00000019940           | 48,546,048-48,556,659 |
| No description |                           |                | ENSGALP00000030477        | 48,522,694-48,522,901        |                       |
| <b>PDE1C</b>   |                           |                | <b>ENSGALP00000019935</b> | <b>48,463,226-48,584,380</b> |                       |
| No description |                           |                | ENSGALP00000019936        | 48,290,077-48,295,790        |                       |
| LSM5           |                           |                | ENSGALP00000019908        | 48,174,060-48,177,770        |                       |
| KIAA0241       |                           |                | ENSGALP00000019901        | 48,135,972-48,171,609        |                       |
| KBTBD2         |                           |                | ENSGALP00000019897        | 48,122,874-48,127,240        |                       |
| <i>Xenopus</i> | Sca. 588                  | No description | ENSXETP00000050587        | 2,632-14,833                 |                       |
|                |                           | ITGA9          | ENSXETP00000050595        | 27,370-264,562               |                       |
|                |                           | NEUROD6        | ENSXETP00000050601        | 393,890-394,903              |                       |
|                |                           | C7orf16        | ENSXETP00000050625        | 530,823-534,682              |                       |
|                |                           | <b>PDE1C</b>   | <b>ENSXETP00000050616</b> | <b>527,660-614,294</b>       |                       |
|                |                           | No description | ENSXETP00000022786        | 652,885-654,078              |                       |

|                  |               |                |                            |                              |
|------------------|---------------|----------------|----------------------------|------------------------------|
| Zebrafish        | Zv7_sca. 2640 | No description | ENSDARESTP00000035364      | 34,492-39,056                |
|                  |               | zgc:73275      | ENSDARP00000065350         | 158,849-178,673              |
|                  |               | No description | ENSDARESTP00000008040      | 174,807-178,673              |
|                  |               | No description | ENSDARESTP00000008042      | 215,539-316,483              |
|                  |               | <b>PDE1Ca</b>  | <b>ENSDARP00000067654</b>  | <b>300,136-331,748</b>       |
| Medaka           | Chr. 17       | No description | ENSORLTP00000022159        | 29,666,544-29,667,524        |
|                  |               | No description | ENSORLTP00000022227        | 30,150,667-30,181,732        |
|                  |               | ADCYAP1R1      | ENSORLTP00000022250        | 30,187,008-30,206,172        |
|                  |               | FYCO1          | ENSORLTP00000022262        | 30,259,354-30,281,847        |
|                  |               | XCR1           | ENSORLTP00000022264        | 30,285,683-30,286,675        |
|                  |               | NEUROD6        | ENSORLTP00000022266        | 30,354,947-30,355,951        |
|                  |               | <b>PDE1Ca</b>  | <b>ENSORLTP00000022278</b> | <b>30,378,326-30,409,681</b> |
|                  |               | No description | ENSORLTP00000022280        | 30,445,574-30,447,865        |
|                  |               | No description | ENSORLTP00000022291        | 30,533,140-30,539,249        |
|                  |               | No description | ENSORLTP00000022292        | 30,551,838-30,559,225        |
|                  |               | No description | ENSORLTP00000022301        | 30,562,554-30,577,469        |
|                  |               | RGS20          | ENSORLTP00000022303        | 30,584,840-30,590,255        |
| Medaka           | Chr. 4        | ADCYAP1R1      | ENSORLTP00000016315        | 23,140,165-23,151,683        |
|                  |               | FYCO1          | ENSORLTP00000020832        | 31,574,629-31,594,664        |
|                  |               | XCR1           | ENSORLTP00000020837        | 31,597,704-31,601,230        |
|                  |               | ATF6           | ENSORLTP00000020861        | 31,630,439-31,659,486        |
| Medaka           | Chr. 20       | C14orf122      | ENSORLTP00000016704        | 22,257,445-22,262,989        |
|                  |               | IRF9           | ENSORLTP00000016713        | 22,263,930-22,267,315        |
|                  |               | RNF31          | ENSORLTP00000016757        | 22,269,021-22,282,027        |
|                  |               | PSME2          | ENSORLTP00000016814        | 22,284,737-22,287,783        |
|                  |               | LSM5           | ENSORLTP00000016836        | 22,287,820-22,289,086        |
|                  |               | KIAA0241       | ENSORLTP00000016864        | 22,291,176-22,297,892        |
|                  |               | KBTD2          | ENSORLTP00000016874        | 22,299,997-22,303,357        |
| <i>Tetraodon</i> | Un_random     | No description | ENSTNIT00000022040         | 20,600,675-20,614,560        |
|                  |               | ADCYAP1R1      | ENSTNIT00000022041         | 20,618,267-20,626,114        |
|                  |               | FYCO1          | ENSTNIT00000022042         | 20,645,306-20,652,836        |
|                  |               | No description | ENSTNIT00000022043         | 20,661,851-20,663,214        |
|                  |               | NEUROD6        | ENSTNIT00000022044         | 20,680,898-20,681,908        |
|                  |               | No description | ENSTNIT00000022045         | 20,691,942-20,693,382        |
|                  |               | <b>PDE1Ca</b>  | <b>ENSTNIT00000022046</b>  | <b>20,697,673-20,711,039</b> |
|                  |               | No description | ENSTNIT00000022047         | 20,754,673-20,759,204        |
|                  |               | No description | ENSTNIT00000022048         | 20,768,737-20,770,044        |
|                  |               | No description | ENSTNIT00000022049         | 20,772,346-20,775,272        |

|                  |           |                |                           |                              |
|------------------|-----------|----------------|---------------------------|------------------------------|
|                  |           | RGS20          | ENSTNIT00000022050        | 20,779,427-20,780,481        |
| <i>Tetraodon</i> | Un_random | No description | ENSTNIT00000006561        | 9,853,352-9,856,797          |
|                  |           | No description | ENSTNIT00000002026        | 9,869,857-9,873,483          |
|                  |           | PPAPR5         | ENSTNIT00000008124        | 9,976,996-9,981,214          |
|                  |           | No description | ENSTNIT00000008123        | 9,986,453-9,992,564          |
|                  |           | ABCD3          | ENSTNIT00000008122        | 9,995,328-10,006,686         |
|                  |           | <b>PDE1Cb</b>  | <b>ENSTNIT00000008121</b> | <b>10,018,802-10,025,299</b> |
|                  |           | No description | ENSTNIT00000008120        | 10,025,737-10,027,797        |
|                  |           | TRDMT1         | ENSTNIT00000003137        | 10,032,770-10,037,838        |
|                  |           | RSU1           | ENSTNIT00000008119        | 10,028,342-10,031,828        |
|                  |           | No description | ENSTNIT00000006614        | 10,050,628-10,054,476        |
|                  |           | PTBP2          | ENSTNIT00000022375        | 10,078,957-10,086,773        |
|                  |           | TGFBR1         | ENSTNIT00000022376        | 10,155,406-10,160,175        |
| <i>Tetraodon</i> | Chr. 1    | No description | ENSTNIT00000022967        | 175,149-177,022              |
|                  |           | FYCO1          | ENSTNIT00000009582        | 14,265,310-14,274,311        |
|                  |           | ATF6           | ENSTNIT00000013791        | 14,699,758-14,711,482        |
|                  |           | ADCYAP1R1      | ENSTNIT00000009160        | 22,911,954-22,915,993        |
| <i>Tetraodon</i> | Un_random | No description | ENSTNIT00000011723        | 89,543,441-89,545,958        |
|                  |           | KBTBD2         | ENSTNIT00000011724        | 89,547,867-89,551,070        |
|                  |           | KIAA0241       | ENSTNIT00000011725        | 89,553,567-89,559,790        |
|                  |           | LSM5           | ENSTNIT00000011726        | 89,560,445-89,561,959        |
|                  |           | PSME2          | ENSTNIT00000011727        | 89,561,973-89,563,735        |
|                  |           | RNF31          | ENSTNIT00000002130        | 89,564,786-89,570,932        |
|                  |           | IRF9           | ENSTNIT00000011730        | 89,571,760-89,573,470        |
| Stickleback      | GroupIII  | No description | ENSGACT00000022685        | 12,992,509-12,997,481        |
|                  |           | No description | ENSGACT00000022693        | 13,000,537-13,002,163        |
|                  |           | No description | ENSGACT00000022721        | 13,012,101-13,017,190        |
|                  |           | <b>PDE1Ca</b>  | <b>ENSGACP00000022683</b> | <b>13,038,856-13,072,774</b> |
|                  |           | NEUROD6        | ENSGACT00000022727        | 13,086,480-13,087,485        |
|                  |           | XCR1           | ENSGACT00000022730        | 13,102,288-13,103,869        |
|                  |           | FYCO1          | ENSGACT00000022735        | 13,106,071-13,116,555        |
|                  |           | ADCYAP1R1      | ENSGACT00000022739        | 13,136,933-13,151,610        |
|                  |           | No description | ENSGACT00000022744        | 13,156,738-13,171,395        |
|                  |           | EEF1D          | ENSGACT00000022748        | 13,174,470-13,181,073        |
| Stickleback      | GroupVIII | ADCYAP1R1      | ENSGACT00000007161        | 4,746,933-4,754,805          |
|                  |           | ATF6           | ENSGACT00000015511        | 15,070,643-15,090,855        |
|                  |           | XCR1           | ENSGACT00000015563        | 15,115,220-15,116,795        |

|             |          |                |                           |                        |
|-------------|----------|----------------|---------------------------|------------------------|
|             |          | FYCO1          | ENSGACT00000015578        | 15,118,216-15,127,957  |
| Stickleback | GroupXXI | No description | ENSGACT00000007318        | 11,434,878-11,481,114  |
|             |          | No description | ENSGACT00000007321        | 11,470,556-11,471,458  |
|             |          | LSM5           | ENSGACT00000007338        | 11,494,158-11,496,788  |
|             |          | KIAA0241       | ENSGACT00000007357        | 11,497,735-11,506,320  |
|             |          | KBTBD2         | ENSGACT00000007365        | 11,510,842-11,514,721  |
|             |          | No description | ENSGACT00000007368        | 11,523,776-11,524,908  |
| Stickleback | Sca. 154 | <b>PDE1Cb1</b> | ENSGACT00000000002        | 1,880-13,338           |
|             |          | No description | ENSGACT00000000003        | 47,616-48,140          |
|             |          | No description | ENSGACT00000000004        | 56,205-56,936          |
|             |          | No description | ENSGACT00000000005        | 171,475-172,632        |
| Stickleback | Sca. 37  | No description | ENSGACT00000001124        | 484,382-495,230        |
|             |          | No description | ENSGACT00000001129        | 498,939-502,916        |
|             |          | No description | ENSGACT00000001132        | 508,232-543,386        |
|             |          | No description | ENSGACT00000001137        | 552,712-648,114        |
|             |          | <b>PDE1Cb2</b> | <b>ENSGACT00000001141</b> | <b>629,537-638,040</b> |
|             |          | No description | ENSGACT00000001144        | 686,847-687,371        |
|             |          | No description | ENSGACT00000001150        | 731,296-732,371        |
|             |          | No description | ENSGACT00000001156        | 746,347-746,871        |
|             |          | HECW1          | ENSGACT00000001165        | 759,377-785,300        |
|             |          | No description | ENSGACT00000001168        | 790,394-802,495        |
| Stickleback | Sca. 134 | No description | ENSGACT00000001216        | 68,828-95,132          |
|             |          | No description | ENSGACT00000001218        | 116,764-117,285        |
|             |          | No description | ENSGACT00000001220        | 131,619-133,256        |
|             |          | No description | ENSGACT00000001223        | 147,433-148,553        |
|             |          | No description | ENSGACT00000001225        | 158,036-225,098        |
|             |          | No description | ENSGACT00000001228        | 217,772-218,859        |
|             |          | <b>PDE1Cb3</b> | <b>ENSGACP00000001232</b> | <b>230,028-237,051</b> |
| Stickleback | Sca. 223 | No description | ENSGACT00000001439        | 48,196-50,808          |
|             |          | <b>PDE1Cb4</b> | <b>ENSGACP00000001443</b> | <b>61,833-69,270</b>   |
|             |          | No description | ENSGACT00000001446        | 73,738-74,265          |
|             |          | No description | ENSGACT00000001448        | 79,087-80,059          |
| Stickleback | Sca. 215 | No description | ENSGACT00000001561        | 39,095-40,194          |
|             |          | <b>PDE1Cb5</b> | <b>ENSGACP00000001564</b> | <b>54,335-64,086</b>   |
|             |          | No description | ENSGACT00000001567        | 72,788-73,760          |

|             |                |                    |                           |                        |
|-------------|----------------|--------------------|---------------------------|------------------------|
| Stickleback | Sea. 94        | No description     | ENSGACT00000014862        | 340,146-340,661        |
|             |                | No description     | ENSGACT00000014865        | 351,658-352,197        |
|             |                | No description     | ENSGACT00000014868        | 351,830-387,624        |
|             |                | No description     | ENSGACT00000014871        | 381,420-382,212        |
|             |                | No description     | ENSGACT00000014873        | 407,290-409,612        |
|             |                | No description     | ENSGACT00000014876        | 414,836-415,357        |
|             |                | <b>PDE1Cb6</b>     | <b>ENSGACP00000014854</b> | <b>461,258-473,783</b> |
|             | No description | ENSGACT00000014884 | 483,064-484,036           |                        |
| Stickleback | Sea. 188       | No description     | ENSGACT00000020738        | 54,230-54,751          |
|             |                | No description     | ENSGACT00000020739        | 62,923-64,267          |
|             |                | <b>PDE1Cb7</b>     | <b>ENSGACP00000020708</b> | <b>77,715-86,372</b>   |
| Stickleback | Sea. 809       | <b>PDE1Cbx</b>     | <b>ENSGACP00000001336</b> | <b>3,388-7,099</b>     |

---

**Table S2 - List of chordate species and PDE1 genes analyzed in this study with Ensembl Gene IDs**

| Species     | Scientific name               | Name               | Ensembl ID                       |
|-------------|-------------------------------|--------------------|----------------------------------|
| Human       | <i>Homo sapiens</i>           | PDE1C              | ENSP00000284920                  |
|             |                               | PDE1A              | ENSP00000329112                  |
| Chicken     | <i>Gallus gallus</i>          | PDE1C              | ENSGALP00000019935               |
|             |                               | PDE1A              | ENSGALP00000014423               |
| Frog        | <i>Xenopus tropicalis</i>     | PDE1C              | ENSXETP00000050616               |
|             |                               | PDE1A <sup>a</sup> | --                               |
| Pufferfish  | <i>Tetraodon nigroviridis</i> | PDE1Ca             | GSTENP00034501001 <sup>b</sup>   |
|             |                               | PDE1Cb             | GSTENP00009446001 <sup>c</sup>   |
|             |                               | PDE1A <sup>a</sup> | --                               |
| Medaka      | <i>Oryzias latipes</i>        | PDE1Ca             | ENSORLP00000022278               |
|             |                               | PDE1A              | ENSORLP00000017334               |
| Stickleback | <i>Gasterosteus aculeatus</i> | PDE1Ca             | ENSGACP00000022683               |
|             |                               | PDE1Cb1            | ENSGACP00000000002               |
|             |                               | PDE1Cb2            | ENSGACP00000001141               |
|             |                               | PDE1Cb3            | ENSGACP00000001232 <sup>d</sup>  |
|             |                               | PDE1Cb4            | ENSGACP00000001443 <sup>d</sup>  |
|             |                               | PDE1Cb5            | ENSGACP00000001564               |
|             |                               | PDE1Cb6            | ENSGACP000000014854              |
|             |                               | PDE1Cb7            | ENSGACP000000020708              |
|             |                               | PDE1Cx             | ENSGACP00000001336 <sup>e</sup>  |
|             |                               | PDE1A              | ENSGACP000000010793              |
| Zebrafish   | <i>Danio rerio</i>            | PDE1Ca             | ENSDARP000000067654 <sup>e</sup> |
|             |                               | PDE1A              | ENSDARP000000080640              |
| Ascidian    | <i>Ciona intestinalis</i>     | PDE1               | ENSCINP000000013646              |

<sup>a</sup> A corresponding genes was not found by BLAST searches against the genome sequence.

<sup>b</sup> Current Ensembl ID is ENSTNIT00000022046.

<sup>c</sup> Current Ensembl ID is ENSTNIT00000008121.

<sup>d</sup> Full length sequences were predicted using the program Wise2.

<sup>e</sup> Only a partial sequence was found.
